# Supplementary material for: Toward a Unifying Account of Dopamine’s Role in Cost-Benefit Decision Making
Source: PubMed Central journal article supplement (PMC10140448; doi:10.1016/j.bpsgos.2022.02.010), 2022-03-08
Supplement: mmc1.pdf [file mmc1.pdf]

## Supplementary Information for

# Towards a Unifying Account of Dopamine's Role in Cost-Benefit Decision Making

### *Mathematical formulation of the proposed framework*

We propose that dopamine affects different components of the choice process, which can be modelled as a drift diffusion-style process. Drift diffusion models assume that, after a non-decision time  $\tau$ , evidence is accumulated with a velocity (drift rate)  $v$  from a starting bias  $\zeta$  until a decision threshold  $\alpha$  is reached. Following the assumptions of the OpAL or accelerator/brake models (1), we assume that the drift rate towards the boundaries depends on the linear combination of the differences in reward magnitude ( $\text{Magnitude}_{\text{diff}}$ ) and action costs ( $\text{Cost}_{\text{diff}}$ ) between two choice options:

$$v = \beta_{\text{magnitude}} \times \text{Magnitude}_{\text{diff}} - \beta_{\text{cost}} \times \text{Cost}_{\text{diff}}$$

According to the proximity account (2), the starting bias parameter is sensitive to the proximity advantage of one option over the other ( $\text{Proximity}_{\text{diff}}$ ), which can be formalized as follows:

$$\zeta = \beta_0 - \beta_{\text{proximity}} \times \text{Proximity}_{\text{diff}}$$

We posit that dopaminergic D1R and D2R activity affects different subcomponents of this choice process, making clear predictions regarding which aspect of the choice process should be affected by a drug as a function of its effects on D1R and D2R family activation. D1R activation determines the weight assigned to rewards in the evidence accumulation process ( $\beta_{\text{magnitude}}$ ). In contrast, D2R activation affects the weight assigned to both action costs during evidence accumulation (with higher D2R activation reducing  $\beta_{\text{cost}}$ ) and to proximity effects on the starting bias (with higher D2R activation increasing  $\beta_{\text{proximity}}$ ). Analyzing existing or novel

datasets with drift diffusion models allows empirically testing these assumptions and modifying the proposed framework according to the empirical findings.

We note that another model of the authors of the proximity account assumes that D1-mediated benefit processing is weighed against D2-mediated cost processing ((3); see also equation 1 in (2)), but in the formulation of the proximity account the idea that D2R activation computes the acceptable costs appears to have been crowded out by the focus on proximity. In their normative account of how manipulating dopamine levels affects value-based choice, the authors of the proximity account do not explicitly assume distinct roles for D1R and D2R neurotransmission. Given the evidence for dissociable influences of D1R and D2R activation on decision making, we propose that combining the assumptions of a D2-mediated cost control with proximity-dependent dopaminergic effects may provide the best explanation for the role of dopamine in cost-benefit decision making, as we describe in the main text.

#### *Disentangling proximity and action costs*

In most situations, action costs and proximity differences are strongly correlated. In intertemporal decision making, for example, immediate rewards are also perceived as more proximate than delayed rewards. However, it is possible to experimentally disentangle proximity and action costs by manipulating the concreteness of the delayed reward, e.g. via episodic event cues. In some previous experiments, a reward in the future was presented either with or without an episodic cue for an event occurring at the time of reward delivery (e.g., “vacation in Paris in 180 days”; Figure S1A/B) (4-6). These episodic event cues increased the proportion of larger-later choices, which was explained by the assumption that the event cues make the future rewards more concrete. In other words, these event cues reduced the proximity advantage of the immediate over the delayed reward without affecting the action costs (as the waiting time stayed the same). If this assumption is correct, then from the perspective of process models the more patient choices in conditions with compared to without episodic event cues

should result from a shift in the starting bias towards the delayed reward. In contrast, the weighted influences of rewards and delay costs on the evidence accumulation process *per se* should be unaffected. Thus, episodic event cues, which render future or also risky outcomes more concrete (5), provide a tool for disentangling proximity and action costs. Manipulations like these may even allow assigning a proximity advantage to the costlier option if the difference in action costs between the options is small (Figure S1C).

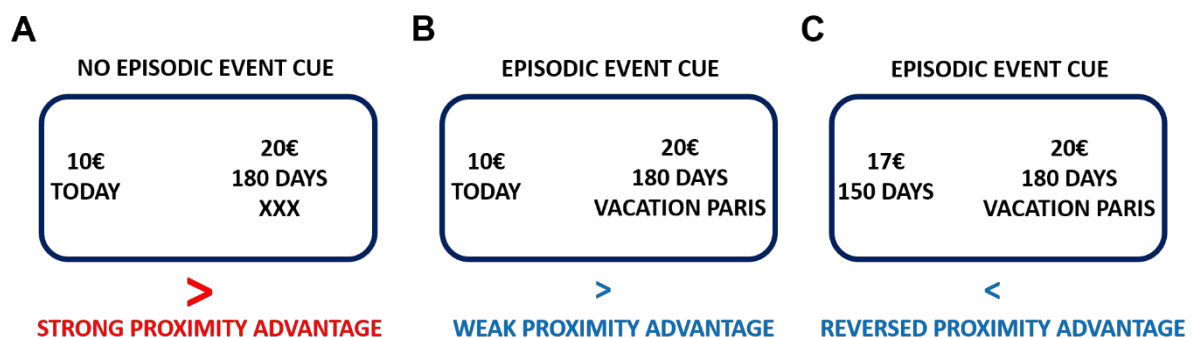

*Figure S1.* Experimentally manipulating proximity bias. (A) In most experimental paradigms less costly (e.g., immediate) rewards have a proximity advantage over costlier (e.g., delayed) rewards. However (B), this proximity advantage can be reduced by making the delayed option more concrete, for example via episodic event cues. (C) If differences in action costs are sufficiently small (e.g., slightly less reward in 150 days versus in 180 days), such event cues may even allow reversing the proximity bias and assigning a proximity advantage to the costlier over the less costly reward.

## Supplementary References

1. Beeler JA, Mourra D (2018): To do or not to do: dopamine, affordability and the economics of opportunity. *Frontiers in integrative neuroscience*. 12:6.
2. Westbrook A, Frank M (2018): Dopamine and Proximity in Motivation and Cognitive Control. *Curr Opin Behav Sci*. 22:28-34.
3. Collins AG, Frank MJ (2014): Opponent actor learning (OpAL): modeling interactive effects of striatal dopamine on reinforcement learning and choice incentive. *Psychological review*. 121:337-366.
4. Peters J, Buchel C (2010): Episodic future thinking reduces reward delay discounting through an enhancement of prefrontal-mediocortical interactions. *Neuron*. 66:138-148.
5. Mok JN, Kwan D, Green L, Myerson J, Craver CF, Rosenbaum RS (2020): Is it time? Episodic imagining and the discounting of delayed and probabilistic rewards in young and older adults. *Cognition*. 199:104222.
6. Bulley A, Gullo MJ (2017): The influence of episodic foresight on delay discounting and demand for alcohol. *Addictive behaviors*. 66:1-6.

**Supplementary Tables***Table S1.* Effects of dopaminergic manipulations on decisions involving trade-offs between rewards and delay costs.

| <b>First author</b> | <b>Year</b> | <b>N</b> | <b>Design</b> | <b>Drug</b>    | <b>Dose</b>            | <b>Receptor</b> | <b>Action</b> | <b>Outcome</b>                          |
|---------------------|-------------|----------|---------------|----------------|------------------------|-----------------|---------------|-----------------------------------------|
| De Wit              | 2002        | 36       | Within        | d-amphetamine  | 10 mg<br>20 mg         | D1/D2           | agonist       | less delay discounting under 20 mg dose |
| Kayser              | 2012        | 23       | Within        | tolcapone      | 200 mg                 | D1/D2           | agonist       | less delay discounting                  |
| Acheson             | 2008        | 32       | Within        | d-amphetamine  | 20 mg                  | D1/D2           | agonist       | no effect                               |
|                     |             |          |               | bupropion      | 150 mg<br>300 mg       | D1/D2           | agonist       | no effect                               |
| Soutschek           | 2020        | 120      | Between       | PF-06412562    | 6 mg<br>15 mg<br>30 mg | D1              | agonist       | no effect                               |
| Pine                | 2010        | 13       | Within        | l-dopa         | 150 mg                 | D1/D2           | agonist       | stronger delay discounting              |
|                     |             |          |               | haloperidol    | 1.5 mg                 | D2              | antagonist    | no effect                               |
| Kelm                | 2013        | 15       | Within        | APTD           |                        | D1/D2           | antagonist    | no effect                               |
| Hamidovic           | 2008        | 10       | Within        | pramipexole    | 0.25 mg<br>0.5 mg      | D2              | agonist       | no effect                               |
| Arrondo             | 2015        | 14       | Within        | metoclopramide | 10 mg                  | D2              | antagonist    | less delay discounting                  |
| Soutschek           | 2017        | 55       | Within        | amisulpride    | 400 mg                 | D2              | antagonist    | less delay discounting                  |
| Weber               | 2016        | 81*      | Between       | amisulpride    | 400 mg                 | D2              | antagonist    | less delay discounting                  |
| Wagner              | 2020        | 54       | Between       | haloperidol    | 1.5 mg                 | D2              | antagonist    | less delay discounting                  |
| Petzold             | 2019        | 87       | Within        | l-dopa         | 150 mg                 | D1/D2           | agonist       | no effects                              |

Action can be direct (through binding at receptors) or indirect, e.g. by blocking reuptake.

\*The study included an additional group of 40 participants who received the opioid receptor antagonist naltrexone.

APTD: acute phenylalanine/tyrosine depletion method.

Table S2. Effects of dopaminergic manipulations on risky decision making.

| First author        | Year | N   | Design  | Drug            | dose                   | Receptor | Action     | Outcome                                                        |
|---------------------|------|-----|---------|-----------------|------------------------|----------|------------|----------------------------------------------------------------|
| De Wit              | 2002 | 36  | Within  | d-amphetamine   | 10 mg<br>20 mg         | D1/D2    | agonist    | no effect                                                      |
| Rigoli              | 2016 | 32  | Within  | l-dopa          | 150 mg                 | D1/D2    | agonist    | more risky decisions                                           |
| Acheson             | 2008 | 32  | Within  | d-amphetamine   | 20 mg                  | D1/D2    | agonist    | no effect                                                      |
|                     |      |     |         | bupropion       | 150 mg<br>300 mg       | D1/D2    | agonist    | no effect                                                      |
| Soutschek           | 2020 | 120 | Between | PF-06412562     | 6 mg<br>15 mg<br>30 mg | D1       | agonist    | fewer risky choices with increasing dose                       |
| Rutledge            | 2015 | 30  | Within  | l-dopa          | 150 mg                 | D1/D2    | agonist    | more risky decisions for gains                                 |
| Evers               | 2017 | 24  | Within  | methylphenidate | 40 mg                  | D1/D2    | agonist    | no effects                                                     |
| Symmonds            | 2013 | 20  | Within  | l-dopa          | 100 mg                 | D1/D2    | agonist    | no effect                                                      |
| Hamidovic           | 2008 | 10  | Within  | pramipexole     | 0.25 mg<br>0.5 mg      | D2       | agonist    | no effect                                                      |
| Arrondo             | 2015 | 14  | Within  | metoclopramide  | 10 mg                  | D2       | antagonist | no effect                                                      |
| Burke               | 2018 | 93  | Between | amisulpride     | 400 mg                 | D2       | antagonist | less risk aversion and probability distortion                  |
| Ojala               | 2018 | 21  | Within  | sulpiride       | 400 mg                 | D2       | antagonist | less probability distortion                                    |
| Riba                | 2008 | 15  | Within  | pramipexole     | 0.5 mg                 | D2       | agonist    | more risky choices                                             |
| Petzold             | 2019 | 87  | Within  | l-dopa          | 150 mg                 | D1/D2    | agonist    | fewer risky choices in impulsive individuals                   |
| White               | 2007 | 37  | Within  | d-amphetamine   | 20 mg                  | D1/D2    | agonist    | more risky choices in individuals with high reward sensitivity |
| Campbell-Meiklejohn | 2012 | 40  | Between | methylphenidate | 20 mg                  | D1/D2    | agonist    | increased sensitivity to high rewards                          |
| Campbell-Meiklejohn | 2011 | 40  | Between | pramipexole     | 0.176 mg               | D2       | antagonist | reduced loss chasing                                           |
| Norbury             | 2013 | 20  | Within  | cabergoline     | 1.5 mg                 | D2       | agonist    | higher sensitivity to probability of winning                   |
| Zack                | 2007 | 18  | Within  | haloperidol     | 3 mg                   | D2       | antagonist | no effect                                                      |
| Gross               | 2021 | 154 | Between | methylphenidate | 30 mg                  | D1/D2    | agonist    | more risky choices                                             |

Action can be direct (through binding at receptors) or indirect, e.g. by blocking reuptake.

*Table S3.* Effects of dopaminergic manipulations on decisions involving trade-offs between rewards and effort costs.

| <b>First author</b> | <b>Year</b> | <b>N</b> | <b>Design</b> | <b>Drug</b>     | <b>dose</b>            | <b>Receptor</b> | <b>Action</b> | <b>Outcome</b>                                |
|---------------------|-------------|----------|---------------|-----------------|------------------------|-----------------|---------------|-----------------------------------------------|
| Soutschek           | 2020        | 120      | Between       | PF-06412562     | 6 mg<br>15 mg<br>30 mg | D1              | agonist       | more high effort choices with increasing dose |
| Wardle              | 2011        | 17       | Within        | d-amphetamine   | 10 mg<br>20 mg         | D1/D2           | agonist       | more high effort choices under 20 mg dose     |
| Westbrook           | 2020        | 50       | Within        | methylphenidate | 20 mg                  | D1/D2           | agonist       | more high effort choices                      |
| Zenon               | 2016        | 19       | within        | sulpiride       | 400 mg                 | D2              | antagonist    | more high effort choices                      |
| Michely             | 2020        |          |               | l-dopa          | 125 mg                 | D1/D2           | agonist       | more high effort choices                      |
|                     |             |          |               | l-dopa          | 150 mg                 | D1/D2           | agonist       | higher motivation to exert effort             |
|                     |             |          |               | haloperidol     | 1.5 mg                 | D2              | antagonist    | less strategic effort discounting             |
| Cawley              | 2013        | 32       | Within        | APTD            |                        | D1/D2           | antagonist    | lower motivation to exert effort              |
| Dean                | 2016        | 17       | Within        | bupropion       | 150 mg                 | D1/D2           | agonist       | no effect                                     |
| Ohmann              | 2020        | 203      | Between       | sulpiride       | 200 mg                 | D2              | antagonist    | less effort exerted                           |
| Korb                | 2020        | 131      | Between       | amisulpride     | 400 mg                 | D2              | antagonist    | less effort exerted                           |

Action can be direct (through binding at receptors) or indirect, e.g. by blocking reuptake.

APTD: acute phenylalanine/tyrosine depletion method

*Table S4.* Effects of dopaminergic manipulations on prosocial decision making.

| <b>First author</b> | <b>Year</b> | <b>N</b> | <b>Design</b> | <b>Drug</b>     | <b>dose</b> | <b>Receptor</b> | <b>Action</b> | <b>Outcome</b>                                                        |
|---------------------|-------------|----------|---------------|-----------------|-------------|-----------------|---------------|-----------------------------------------------------------------------|
| Soutschek           | 2017        | 55       | Within        | amisulpride     | 400 mg      | D2              | antagonist    | fewer prosocial choices in females<br>more prosocial choices in males |
| Saez                | 2015        | 35       | Within        | tolcapone       | 200 mg      | D1/D2           | agonist       | stronger inequity aversion                                            |
| Pedroni             | 2014        | 197      | Between       | l-dopa          | 300 mg      | D1/D2           | agonist       | fewer prosocial choices in males                                      |
| Oroz-Artigas        | 2019        | 33       | Within        | pramipexole     | 0.35 mg     | D2              | agonist       | fewer prosocial choices in females                                    |
| Crockett            | 2015        | 86       | Between       | l-dopa          | 150 mg      | D1/D2           | agonist       | fewer prosocial choices                                               |
| Gross               | 2021        | 154      | Between       | methylphenidate | 30 mg       | D1/D2           | agonist       | no effect                                                             |

Action can be direct (through binding at receptors) or indirect, e.g. by blocking reuptake.
